# Supplementary material
Source: PubMed Central journal article supplement (PMC6195855)
Supplement: NIHMS962032-supplement-Supp_info.pdf [file NIHMS962032-supplement-Supp_info.pdf]

# Hepatitis B virus evasion from cGAS sensing in human hepatocytes

Eloi R. Verrier, Seung-Ae Yim, Laura Heydmann, Houssein El Saghire, Laurent Mailly, Charlotte Bach, Vincent Turon-Lagot, Sarah C. Durand, Julie Lucifora, David Durantel, Patrick Pessaux, Nicolas Manel, Ivan Hirsch, Mirjam B. Zeisel, Nathalie Pochet, Catherine Schuster and Thomas F. Baumert

## SUPPORTING INFORMATION

### Supplementary Experimental Procedures

**Detection of cGAS protein expression using two independent antibodies.** HepG2-NTCP cells were transfected with a siRNA targeting *MB21D1* expression (sicGAS) or with a non-targeting siRNA control (siCtrl). Three days after transfection, cells were lysed and cGAS protein expression was assessed as described in the Experimental Procedures section using two rabbit polyclonal anti-cGAS antibodies (HPA031700, Sigma & NBP1-86761, Novus Biologicals). Given the proximity of the bands, another western blot was run in parallel for the detection of  $\beta$ -actin as a control. Molecular weights were assessed using the Precision Plus Protein™ Standards molecular weight marker (Bio-Rad).

**Detection of HBV DNA by PCR and qPCR.** DNA was extracted using QiaAMP DNA MiniKit (Qiagen) following manufacturer's instructions. The presence of HBV DNA was confirmed by PCR using the following primers (expected band size: 148 bp) (1) : forward primer 5'-CACCTCGCCTAATCATC-3', reverse primer 5'-GGAAAGAAGTCAGAAGGCA-3'. For qPCR quantification of HBV DNA, The presence of HBV DNA was confirmed by PCR and quantified by qPCR using the following primers and probe (1) : forward primer 5'-CACCTCGCCTAATCATC-3', reverse primer 5'-GGAAAGAAGTCAGAAGGCA-3'; TaqMan probe 5'-[6FAM]-TGGAGGCTTCAACAGTAGGACATGAAC-[BHQ1]-3'. Copy number of HBV was determined using a standard curve.

**Detection of NTCP expression by flow cytometry.** HepG2 cells, HepG2-NTCP-Ctrl\_ORF cells, and HepG2-NTCP-cGAS\_OE cells were treated with the AF647-labelled pres1 peptide for one hour at 37°C as described (1). Cells were then fixed with 2% paraformaldehyde for 20 minutes at room temperature. NTCP expression was then quantified by flow cytometry using MacsQuant instrument (Miltenyi).

## Supplementary Figures

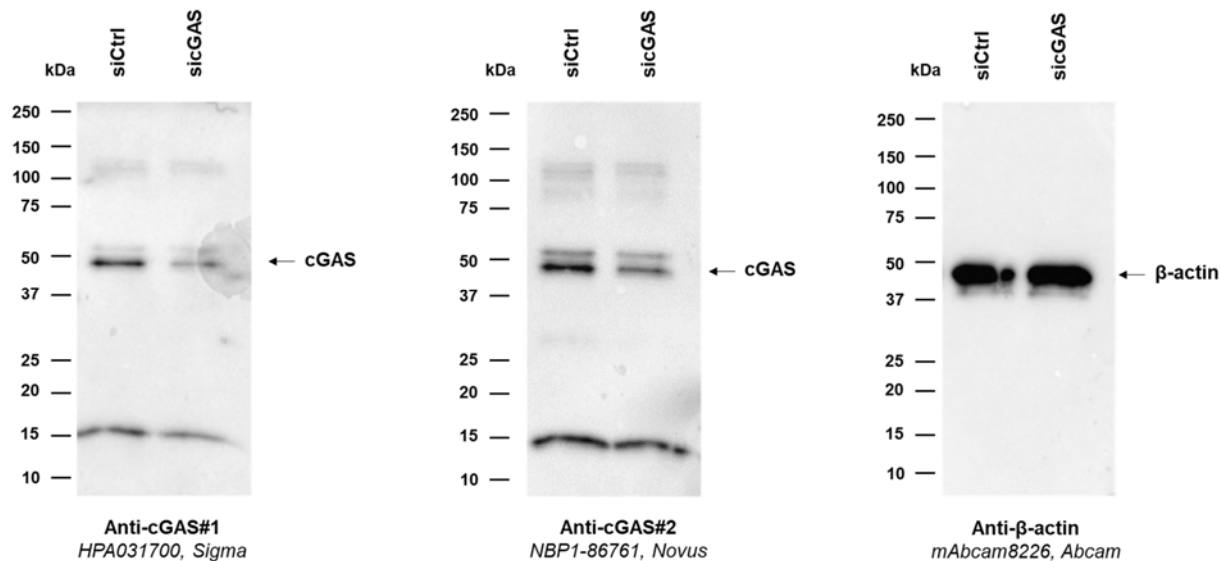

**Figure S1. Detection of cGAS protein in HepG2-NTCP cells (related to Figure. 1).** HepG2-NTCP cells were transfected for three days with a siRNA targeting *MB21D1* expression (sicGAS) or with a non-targeting siRNA control (siCtrl). Cells were then lysed and cGAS protein expression was assessed using two rabbit polyclonal anti-cGAS antibodies (HPA031700, Sigma, used in the main manuscript & NBP1-86761, Novus Biologicals).  $\beta$ -actin expression was assessed as a control. One representative experiment is shown.

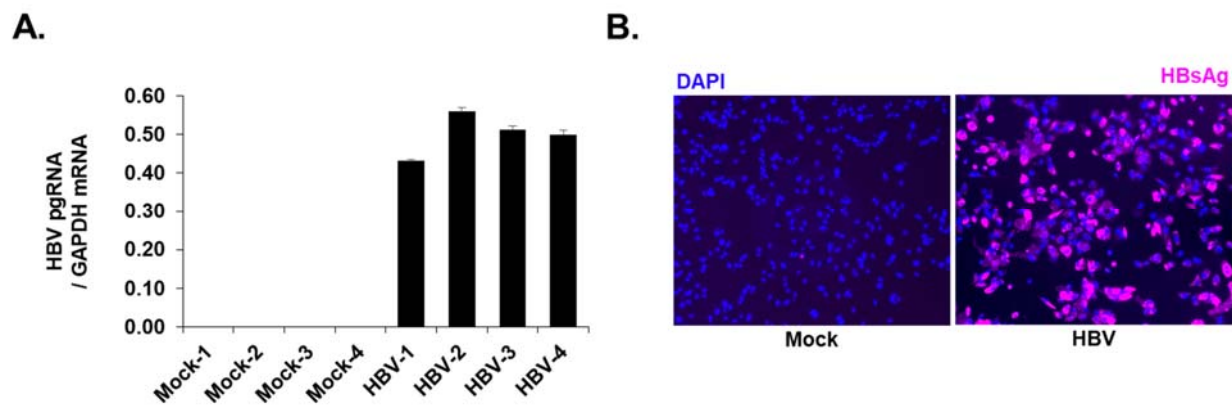

**Figure S2. Analysis of HBV infection in HBV time course samples with quantification of HBV pregenomic RNA and HBsAg expression (related to Figure 2).** HepG2-NTCP cells were infected with HBV as described in Experimental Procedures. 10 days after infection, total RNA was extracted and HBV infection was assessed by quantification of HBV pgRNA as described in Methods. Results are expressed as means  $\pm$  SD HBV pgRNA / GAPDH mRNA from four independent experiments performed in duplicate (corresponding to the four experiments shown in Figure 2A). Alternatively, cells were infected for 10 days in HBV, and HBV infection was assessed by immunofluorescence using an anti-HBsAg antibody. One representative experiment is shown.

**A.**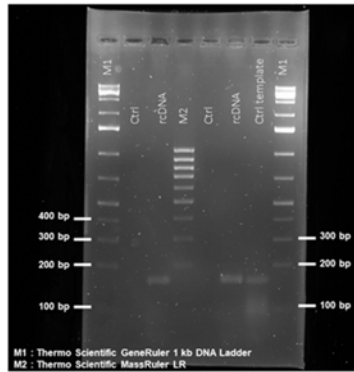**B.**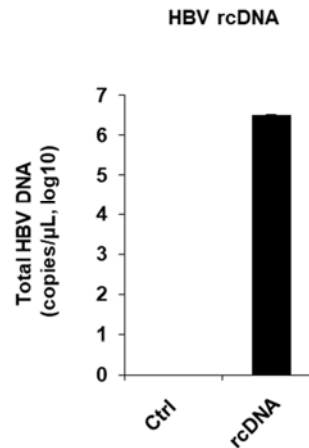

**Figure S3. Analysis and quantification of HBV DNA extracted from HBV infectious particles by PCR (related to Figure 4).** A-B. HBV genomic DNA (rcDNA) was extracted from cell culture-derived HBV virions. Extraction from naive HepG2-NTCP control supernatants without virus was used as a control (Ctrl). HBV DNA standard preparation used as a template for the calculation of HBV DNA concentration was used as a positive control (Ctrl template). The presence of HBV DNA was controlled by PCR (expected band size: 148 base pairs [bp]) (A) and quantified by qPCR (B). Two independent experiments (A) and one experiment performed in triplicate (B) are shown. C. Quantification of total HBV DNA in transfected or infected cells. HepG2-NTCP were infected with HBV or transfected with rcDNA. Three days after transfection/infection, DNA was extracted and total HBV DNA was quantified by qPCR.

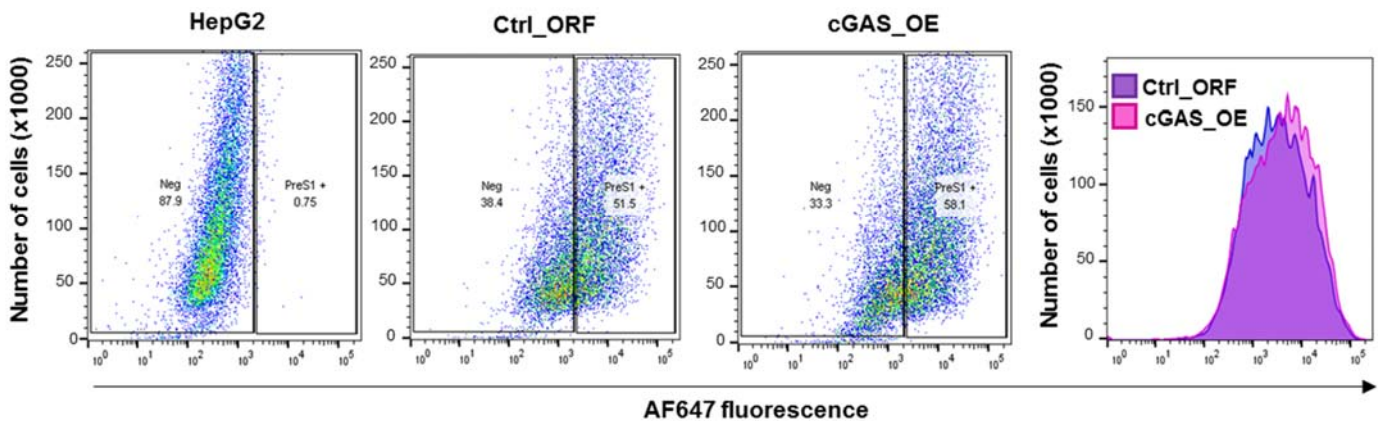

**Figure S4. PreS1-binding/NTCP cell surface expression is independent on cGAS expression.** HepG2 cells, HepG2-NTCP-Ctrl\_ORF cells, and HepG2-NTCP-cGAS\_OE cells were treated with the AF647-labelled preS1 peptide for one hour at 37°C. PreS1 binding corresponding to NTCP expression was quantified by flow cytometry.

## Supplementary Tables

**Tables S1:** Specific probes used for the detection of HBV and Mitochondrial DNA (2).

| Target            | Name      | Sequence                    |
|-------------------|-----------|-----------------------------|
| HBV               | HBV-F1    | TAGCGCCTCATTTTGTGGGT        |
|                   | HBV-R1    | CTTCCTGTCTGGCGATTGGT        |
|                   | HBV-F2    | TAGGACCCCTGCTCGTGTTA        |
|                   | HBV-R2    | CCGTCCGAAGGTTTGGTACA        |
|                   | HBV-F3    | ATGTGGTATTGGGGGCCAAG        |
|                   | HBV-R3    | GGTTGCGTCAGCAAACACTT        |
|                   | HBV-F4    | TGGAACCTTTTCGGCTCCTC        |
|                   | HBV-R4    | GGGAGTCCGCGTAAAGAGAG        |
|                   | HBV-F6    | TACTGCACTCAGGCAAGCAA        |
|                   | HBV-R6    | TGCGAATCCCACTCCGAAA         |
|                   | HBV-F8    | AGACGAAGGTCTCAATCGCC        |
|                   | HBV-R8    | ACCCACAAAATGAGGCGCTA        |
| Mitochondrial DNA | Fw huND1  | CCCTACTTCTAACCTCCCTGTTCTTAT |
|                   | Rw huND1  | CATAGGAGGTGTATGAGTTGGTCGTA  |
|                   | Fw huND5  | ATTTTATTTCTCCAACATACTCGGATT |
|                   | Rw huND5  | GGGCAGGTTTTGGCTCGTA         |
|                   | Fw_huATP6 | CATTTACACCAACCACCCAACACTATC |
|                   | Rw-huATP6 | CGAAAGCCTATAATCACTGTGCC     |

**Tables S2:** Specific probes of the IAR gene set for multiplexed gene profiling analysis.

| Gene   | Accession Number | Target Sequence                                                                                              | Note      |
|--------|------------------|--------------------------------------------------------------------------------------------------------------|-----------|
| ATP5B  | NM_001686.3      | GAAATTCTGGTACTGGTATCAAGGTTGTCGATCTGCTA<br>GCTCCCTATGCCAAGGGTGGCAAATTGGGCTTTTTGGT<br>GGTGCTGGAGTTGGCAAGACTG   | HG        |
| BAG6   | NM_001199698.1   | CATTGATCACGGGGCTAGAAGAGTATGTGCGGGAGAGTT<br>TTTCCTTGGTGCAAGTTCAGCCAGGTGTGGACATCATCC<br>GGACAAACCTGGAATTTCTCCA | HG        |
| NDUFA2 | NM_001185012.1   | ATGGGCTAGGCTTTAGGGTCCGCGGTTGGTCAGACCGG<br>AGCACTTGGCCTGAAGACCTGGAATTGGCGACTTCGATA<br>TTAACAAGGATGGCGGCGGCCGC | HG        |
| ARL9   | NM_206919.1      | CAGATATCCATGAAGCTTTGGCATTATCTGAAGTGGGAAA<br>TGACAGGAAGATGTTCTTGTGGAACTACCTGACTAAG<br>AATGGCTCAGAGATACCCTC    | Schoggins |
| CASP1  | NM_001223.3      | TGGAGACATCCCACAATGGGCTCTGTTTTTATTGGAAGA<br>CTCATTGAACATATGCAAGAATATGCCTGTTCTGTGATG<br>TGGAGGAAATTTCCGCAAGG   | Schoggins |
| CXCL16 | NM_001100812.1   | CCATGGGTTTCAGGAATTGATGAGCTGTCTTGATCTCAA<br>GAATGTGGACATGCTTACTCGGGGATTGTGGCCACCAG<br>AAGCATTACTTCTACCAGCC    | Schoggins |
| CXCL8  | NM_000584.2      | ACAGCAGAGCACACAAGCTTCTAGGACAAGAGCCAGGAA<br>GAAACCACCGGAAGGAACCATCTCACTGTGTGTAACAT<br>GACTTCCAAGCTGGCCGTGGCT  | Schoggins |
| HERC5  | NM_016323.2      | TGGGCTGCTGTTTACTTTCCGGTGCTGGAAAACATGGGCA<br>ACTTGGTCATAATTCAACACAGAATGAGCTAAGACCCTGT<br>TTGGTGGCTGAGCTTGTGGG | Schoggins |

|          |                |                                                                                                               |           |
|----------|----------------|---------------------------------------------------------------------------------------------------------------|-----------|
| HERC6    | NM_001165136.1 | TCCATCACCCAGATTTATACTTAGAGTCAGACGAAGTCGCCTGGTTAAAGATGCTCTGCGTCAATTAAGTCAAGCTGAA<br>GCTACTGACTTCTGCAAAGTA      | Schoggins |
| HLA-B    | NM_005514.6    | CCCTGAGATGGGAGCCGTCTTCCCAGTCCACCGTCCCC<br>ATCGTGGGCATTGTTGCTGGCCTGGCTGTCCTAGCAGTT<br>GTGGTCATCGGAGCTGTGGTCGC  | Schoggins |
| HLA-H    | NR_001434.3    | GAGCGGGAGGGGCCGGAGTATTGGGACCGGAACACACA<br>GATCTGCAAGGCCAAGCACGACTGAACGAGAGAACC<br>TGCGGATCGCGCTCCGCTACTACA    | Schoggins |
| IFI35    | NM_005533.3    | TGCCCTCTGCTTGCGGGCTCTGCTCTGATCACCTTTGAT<br>GACCCCAAAGTGGCTGAGCAGGTGCTGCAACAAAAGGA<br>GCACACGATCAACATGGAGGAGT  | Schoggins |
| IFI44    | NM_006417.4    | GATGAAAGAAAGATAAAAGGGGTCATTGAGCTCAGGAAG<br>AGCTTACTGTCTGCCCTTGAGAACTTATGAACCATATGGAT<br>CCCTGGTTCAACAAATACGAA | Schoggins |
| IFIH1    | NM_022168.2    | GCTTGGGAGAACCCTCTCCCTTCTCTGAGAAAGAAAGAT<br>GTGCAATGGGTATCCACAGACGAGAAATTCGCTATCT<br>CATCTCGTGCTTCAGGGCCAGG    | Schoggins |
| IFIT3    | NM_001031683.2 | CGCCTGCTAAGGGATGCCCTTCAGGCATAGGCAGTATT<br>TTCCTGTCAAGCATCTGAGCTTGAGGATGGTAGTGAGGAA<br>ATGGGCCAGGGCGCAGTCAGCT  | Schoggins |
| ISG20    | NM_002201.5    | AGCCCGCCGAGGGCTGCCCGCCTGGCTGTGTCAGACT<br>GAAGCCCCATCCAGCCCGTCCGCAGGGACTAGAGGCT<br>TTCGGCTTTTTGGGACAGCAACTA    | Schoggins |
| LRRC17   | NM_001031692.1 | CAGCACAACCAGATCAAAGTCTTGACGGAGGAAGTGTT<br>ATTTACACACTCTCTTGAGCTACCTGCGTCTTTATGACA<br>ACCCCTGGCACTGTACTTGTG    | Schoggins |
| MX1      | NM_002462.2    | GCCTTTAATCAGGACATCACTGCTCTCATGCAAGGAGAG<br>GAAACTGTAGGGGAGGAAGACATTCGGCTGTTTACCAGA<br>CTCCGACACGAGTCCACAAAT   | Schoggins |
| OAS2     | NM_016817.2    | TGAAAAACAATTTTCGAGATCCAGAAGTCCCTTGATGGGTT<br>CACCATCCAGGTGTTACAAAAAATCAGAGAATCTCTTTC<br>GAGGTGCTGGCCGCTTCAA   | Schoggins |
| OASL     | NM_198213.1    | GGCGTTTCTGAGCTGTTTCCACAGCTTCCAGGAGGCAGC<br>CAAGCATCACAAGATGTTCTGAGGCTGATATGGAAAAC<br>CATGTGGCAAAGCCAGGACCTG   | Schoggins |
| PLCG2    | NM_002661.2    | GCTTGAAAATCTTACACCAGGAAGCGATGAATGCGTCCA<br>CGCCACCATTATCGAGAGTTGGCTGAGAAAGCAGATAT<br>ATTCTGTGGATCAAACCAGAAG   | Schoggins |
| PSMB8    | NM_004159.4    | ACTCACAGAGACAGCTATTCTGGAGGCGTTGTCAATATG<br>TACCACATGAAGGAAGATGGTTGGGTGAAAGTAGAAAGT<br>ACAGATGTCAGTGACCTGCTGC  | Schoggins |
| PSMB9    | NM_002800.4    | TCAGGTATGGAACCCTGGGAGGAATGCTGACTCGACA<br>GCCTTTTGCCATTGGTGGCTCCGGCAGCACCTTTATCTA<br>TGTTTATGTGGATGCAGCATAT    | Schoggins |
| RARRES3  | NM_004585.3    | CTGACCCTCGTGCCCTGTCTCAGGCGTTCTCTAGATCCT<br>TTCCTCTGTTTCCCTCTCTCGCTGGCAAAGTATGATCTA<br>ATTGAAACAAGACTGAAGGAT   | Schoggins |
| SLC15A3  | NM_016582.1    | GCCGTTTCTCAACTGGTTTTACTGGAGCATCAACCTGG<br>GTGCTGTGCTGTGCTGCTGGTGGTGGCGTTTATTACAGC<br>AGAACATCAGCTTCTGCTGGG    | Schoggins |
| TNFRSF1B | NM_001066.2    | CCCAGCTGAAGGGAGCACTGGCGACTTTCGCTTTCAGT<br>TGGACTGATTGTGGGTGTGACAGCCTTGGGTCTACTAAT<br>AATAGGAGTGGTGAAGTGTGC    | Schoggins |
| UBA7     | NM_003335.2    | GCGGGAGGATGGGTCCCTGGAGATTGGAGACACAACAA<br>CTTTCTCTCGTACTTTCGCTGGTGGGGCTATCACTGAAG<br>TCAAGAGACCCAAGACTGTGAGA  | Schoggins |
| UBE2L6   | NM_004223.3    | TGTTTCAAACCACTTGCCATCCTGTTAGATTGCCAGTTC<br>CTGGGACCAGCCTCAGACTGTGAAGTATATATCCTCCA<br>GCATTACGTCAGGGGGAGCC     | Schoggins |
| ZC3HAV1  | NM_020119.3    | CTCCTTCTTACATCGTAGAAACATGGCATATAGGGCTAG<br>AAGCAAGAGTAGAGATCGGTTCTTTCAGGGCAGCCAAGA<br>ATTTCTTGCGTCTGCTTCAGC   | Schoggins |
| ZMYND15  | NM_032265.1    | CCTCAGAGCGGCCGACAACCTGCATGTCCTGGTACTGCAA<br>TGCCCTCATCTTCCACCTGGTTTACAAGCCTGCTCAAGG<br>GAGCGGGGCCCGCCGGCGCCC  | Schoggins |

|         |             |                                                                                                               |           |
|---------|-------------|---------------------------------------------------------------------------------------------------------------|-----------|
| PMAIP1  | NM_021127.2 | CTAGTGTTTTGCCGAAGATTACCGCTGGCCTACTGTGA<br>AGGGAGATGACCTGTGATTAGACTGGGCGGCTGGGGAG<br>AAACAGTTCAGTGCATTGTTGTT   | Schoggins |
| GBP4    | NM_052941.4 | TTCTACAAGATATGCCATGGGCCTTTTCACAGGGGACAC<br>AGGCTTCTTAAACAACCCGGCTTCTCACCCTATGTCCT<br>TTATTTACAAAGCTGTGCTCC    | Schoggins |
| TMEM173 | NM_198282.1 | CTGGCATGGTCATATTACATCGGATATCTGCGGCTGATC<br>CTGCCAGAGCTCCAGGCCCGGATTGAACTTACAATCAG<br>CATTACAACAACCTGCTACGGG   | STING     |
| IFI16   | NM_005531.1 | ACGACTGAACACAATCAACTGTGAGGAAGGAGATAAACT<br>GAAACTCACCAGCTTTGAATTGGCACCGAAAAGTGGGAA<br>TACCGGGGAGTTGAGATCTGTA  |           |
| IFNB1   | NM_002176.2 | ACAGACTTACAGGTTACCTCCGAAACTGAAGATCTCCTA<br>GCCTGTGCCTCTGGGACTGGACAATTGCTTCAAGCATT<br>TTCAACCAGCAGATGCTGTTTA   |           |
| IRF3    | NM_001571.5 | TCATGGCCCCAGGACCAGCCGTGGACCAAGAGGCTCGT<br>GATGGTCAAGGTTGTGCCACGTGCCTCAGGGCCTTGG<br>TAGAAATGGCCCCGGTAGGGGGTG   |           |
| IRF7    | NM_001572.3 | CGCAGCGTGAGGGTGTGTCTTCCCTGGATAGCAGCAGC<br>CTCAGCCTCTGCCTGTCCAGCGCCAACAGCCTCTATGAC<br>GACATCGAGTGCTTCCCTATGGA  |           |
| STAT1   | NM_139266.1 | ACAGTGGTTAGAAAAGCAAGACTGGGAGCACGCTGCCAA<br>TGATGTTTCATTTGCCACCATCCGTTTTTCATGACCTCCTG<br>TCACAGCTGGATGATCAATAT |           |
| TBK1    | NM_013254.2 | ACCAGTCTTCAGGATATCGACAGCAGATTATCTCCAGGT<br>GGATCACTGGCAGACGCATGGGCACATCAAGAAGGCAC<br>TCATCCGAAAGACAGAAATGTAG  |           |

HG: Housekeeping genes

Schoggins: cGAS-related genes described by Schoggins et al., (3)

## Supplementary References

1. Verrier ER, Colpitts CC, Bach C, Heydmann L, Weiss A, Renaud M, Durand SC, et al. A targeted functional RNAi screen uncovers Glypican 5 as an entry factor for hepatitis B and D viruses. *Hepatology* 2016;63:35–48.
2. Lucifora J, Salvetti A, Marniquet X, Mailly L, Testoni B, Fusil F, Inchauspe A, et al. Detection of the hepatitis B virus (HBV) covalently-closed-circular DNA (cccDNA) in mice transduced with a recombinant AAV-HBV vector. *Antiviral Res* 2017;145:14-19.
3. Schoggins JW, MacDuff DA, Imanaka N, Gainey MD, Shrestha B, Eitson JL, Mar KB, et al. Pan-viral specificity of IFN-induced genes reveals new roles for cGAS in innate immunity. *Nature* 2014;505:691-695.
